# Supplementary material
Source: PubMed Central journal article supplement (PMC5977399)
Supplement: NIHMS966321-supplement.pdf [file NIHMS966321-supplement.pdf]

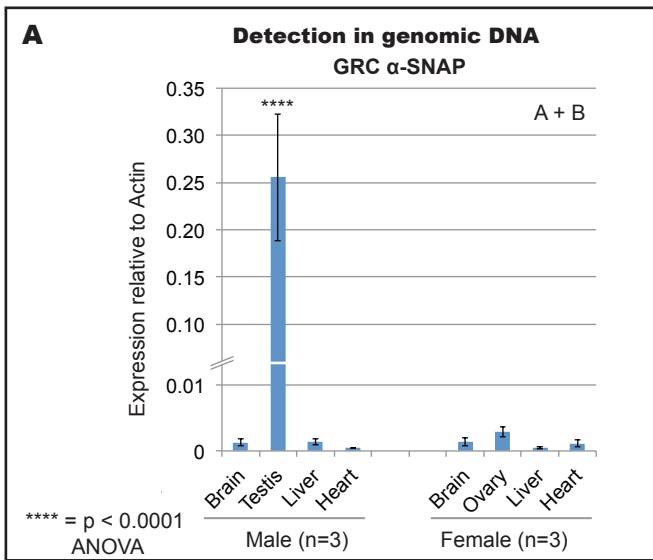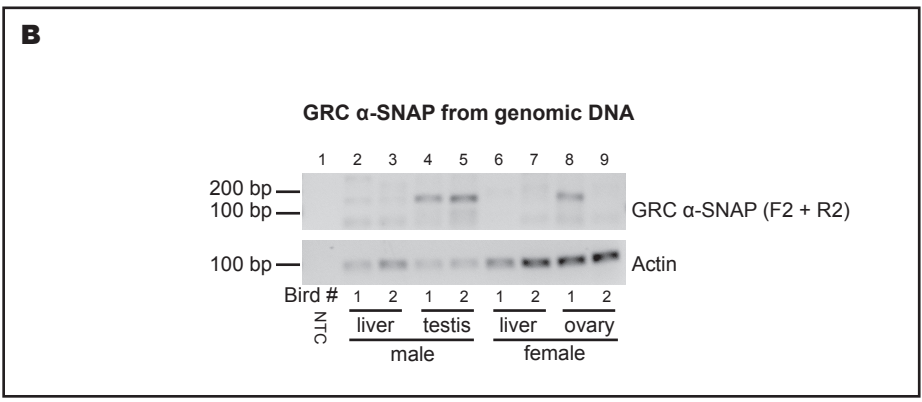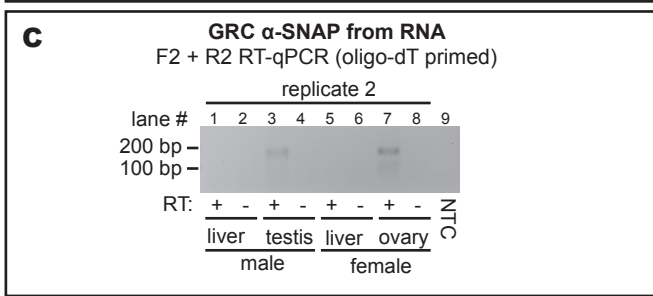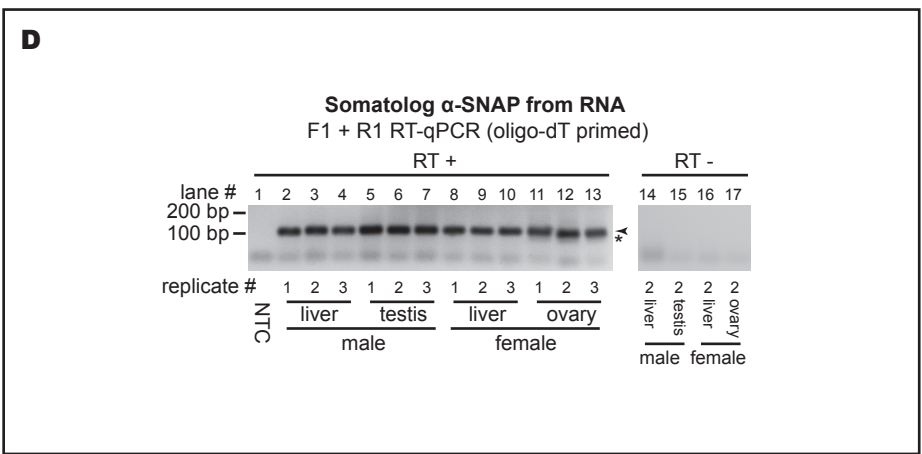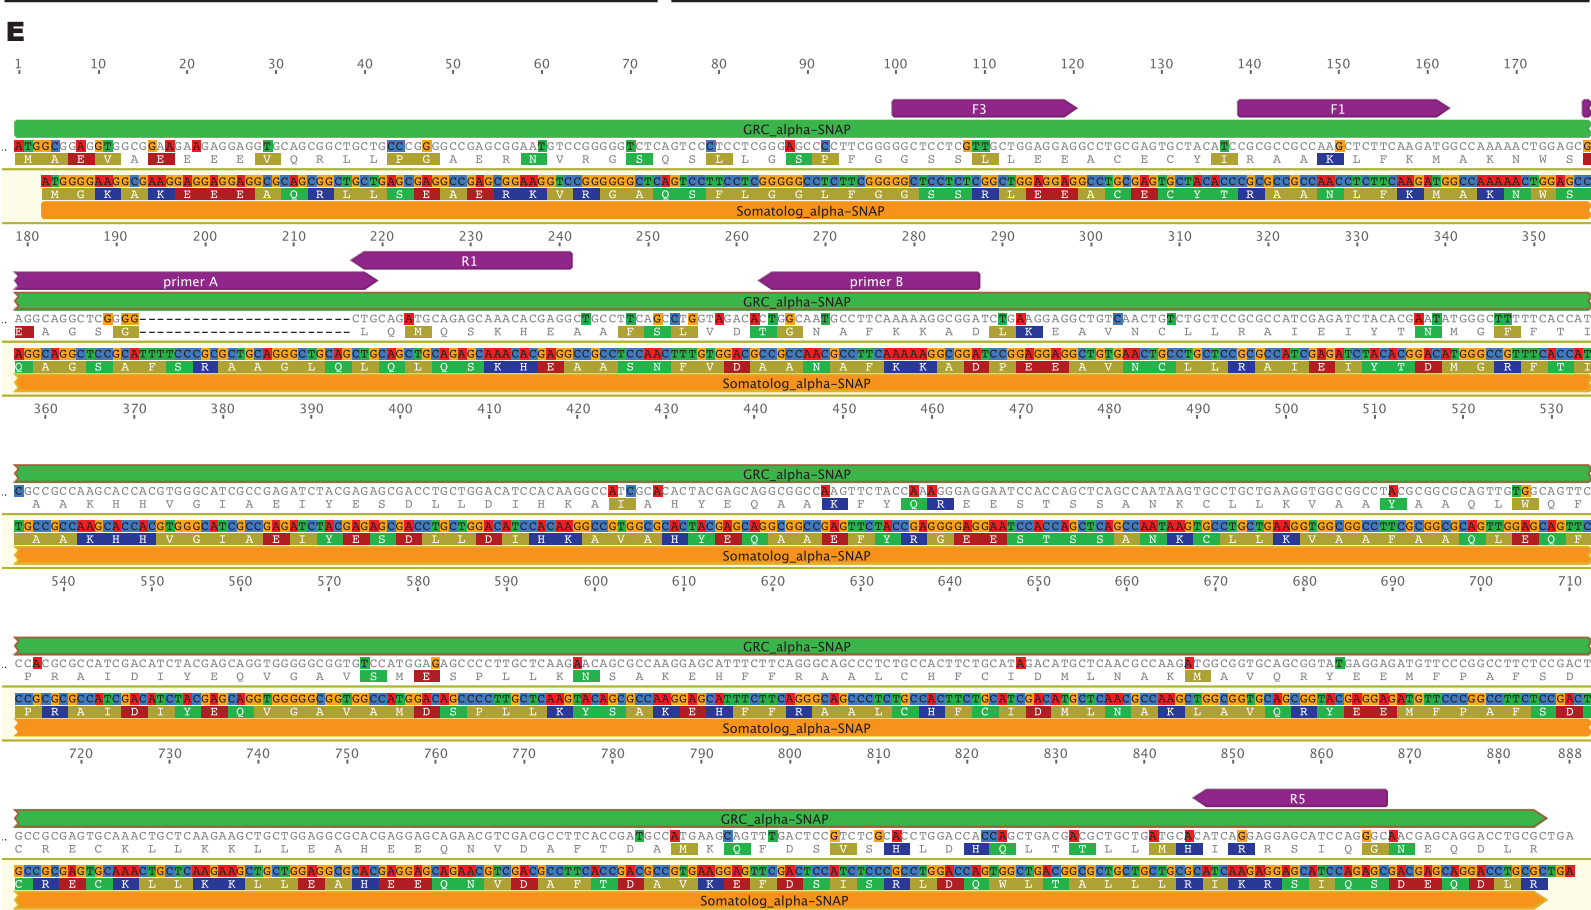

**Figure S1. Molecular analysis of zebra finch  $\alpha$ -SNAP sequences.** Related to Figure 1. **A.** Detection of GRC  $\alpha$ -SNAP with paralog-specific primers A + B (see panel E). Error bars represent standard error of the mean; \*\*\*\* =  $p < 0.0001$  by 2-way ANOVA. **B.** End-point gel electrophoresis confirming detection of GRC  $\alpha$ -SNAP only from germline DNA. Top, F2+R2, bottom, Actin load control. Cloning was used to confirm the abundant band in testis is the expected product. NTC, no-template control. **C.** End-point gel electrophoresis of F2 + R2 RT-qPCR from Figure 1D (oligo-dT primed). Only replicate 2 shown (all qPCR performed in triplicate measurements). NTC, no-template control. **D.** End-point gel electrophoresis of F1 + R1 RT-qPCR from Figure 1E verifying that detected product was somatolog  $\alpha$ -SNAP rather than the GRC. The 24-bp deletion in the GRC yields a 79bp product (asterisk) only detected faintly in ovary; the predominant 103bp product (arrowhead) comes from the somatolog (verified by cloning and sequencing). NTC, no-template control. **E.** Translation alignment of nucleic acid and amino acid sequences of GRC and somatolog  $\alpha$ -SNAP. Color coding: green, GRC  $\alpha$ -SNAP coding sequence, orange, somatolog  $\alpha$ -SNAP coding sequence. Purple, primers used in this study. The somatolog  $\alpha$ -SNAP is set as reference sequence and GRC differences are highlighted.

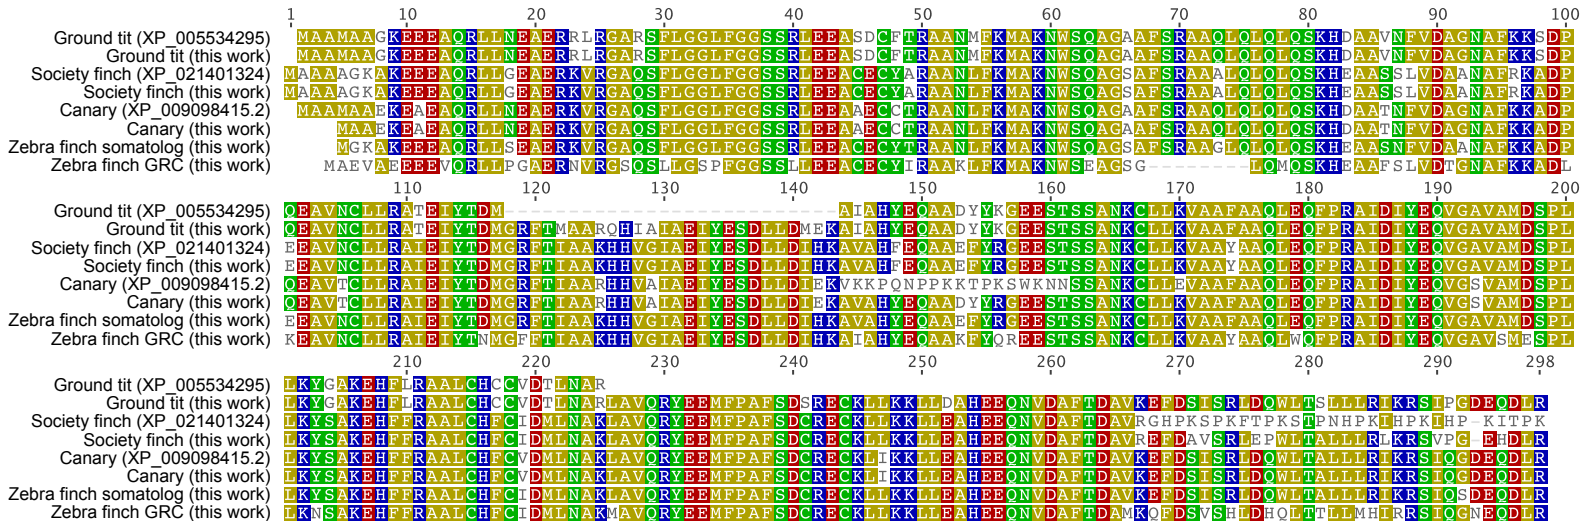

**Figure S2. Protein alignment of Genbank  $\alpha$ -SNAP genes from ground tit, canary, and society finch, compared to *de novo* assembled sequences from this study. Related to Figure 3.**

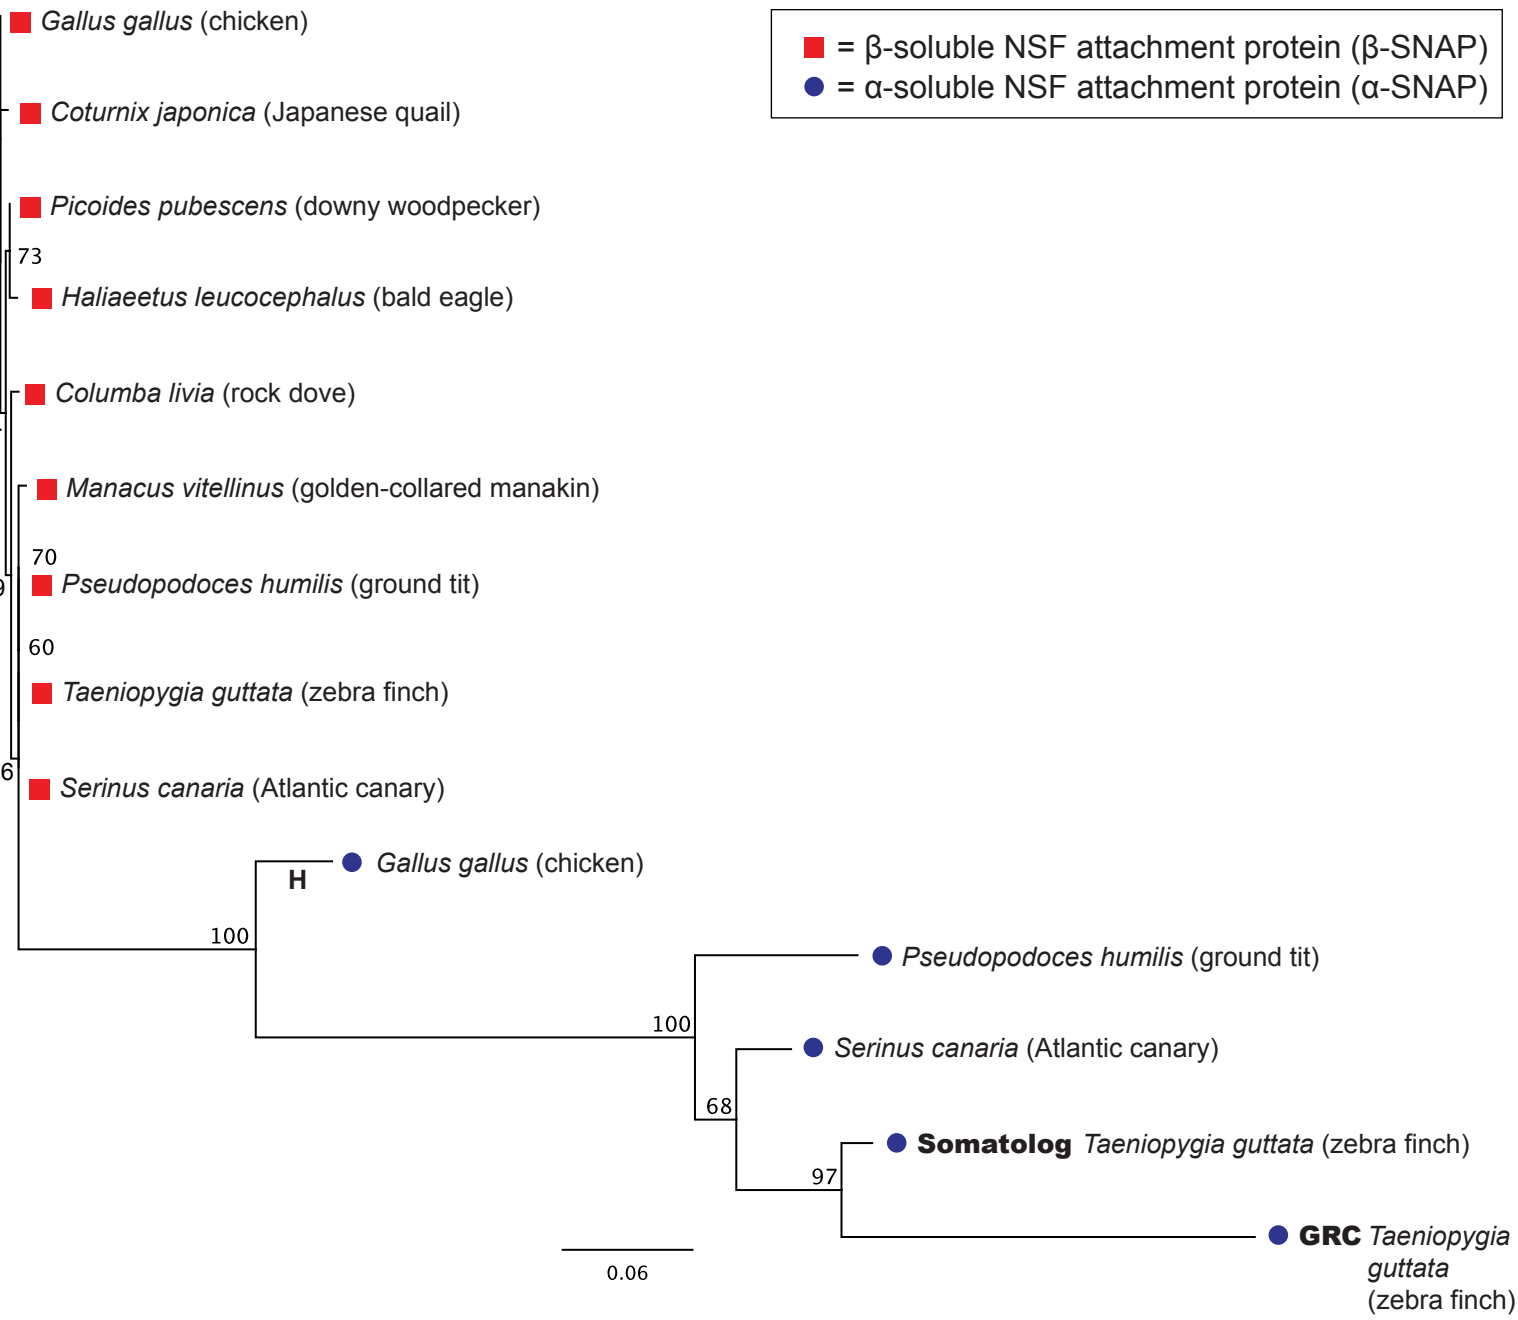

**Figure S3. Maximum likelihood phylogenetic tree of birds.** Related to Figure 2A. Red boxes represent  $\beta$ -SNAP; blue dots represent  $\alpha$ -SNAP proteins. Scale bar represents substitutions per site. Produced using RAxML.
